# Supplementary material
Source: PubMed Central journal article supplement (PMC3337833)
Supplement: epi-7-83-s1.pdf [file epi-7-83-s1.pdf]

Supplemental material to:

Jesús Delgado-Calle, Carolina Sañudo, Agustín F. Fernández, Raúl García-Renedo, Mario F. Fraga and Jose A. Riancho. Role of DNA methylation in the regulation of the RANKL-OPG system in human bone. *Epigenetics* 2012; 7(1):

<http://dx.doi.org/10.4161/epi.7.1.18753>.

<http://www.landesbioscience.com/journals/epigenetics/article/18753>

**A**

TCCTCTCTCCCTTCTGGAGTCACTTTCCTTCCGGAATATGCAAGCTCTGGGT  
GGCCCAGCCCTGCCGCCAGACTCAGTTTCCAAGTGCGGGGGAAGGAGATG  
**GGCGCTCTCAGCCG**CGATCCCCTGGGAAGGTGGCCACTCACCTGCGCTCTG  
AAATAGAAGAACAGGGCGACGCTGCAGACAACCTGGCCCAGCCCCAGCCCC  
**AGGAGGGCCA**CGAACATGGAGCGGGAGGCGGCAGGGGGCTGGTGCGGCG  
CAGGCGGGCGGCGGGGCGTGCAGGGGGCCCTCGTGCGGGGCTCCGGGGCCG  
CCGCCATCTCCTCCGAGCCACGCAG**GTACTTGGTGTAGTCTCTGCTGGCGC**  
GGCGCA

**B**

AACTTGAAGATGAATGATTGCGAACTCCCCGAAAAGGGCTCAGACAATGCC  
ATGCATAAAGAGGGGCCCTGTAATTTGAGGTTTCGAACCCGAAGTGAAGGG  
GTCAGGCAGCCGGGTACGGCGGAACTCACAGCTTTCGCCAGCGAGAGGA  
**CAAAGGTCTGGGACACACT**CCAAGTCGTCCGGATCTTGGCTGGATCGGA  
**CTCTCAGGGTGGAGGAGACACAAGC**ACAGCAGCTGCCAGCGTGTGCCAG  
CCCTCCACCGCTGGTCCCGGCTGCCAGGAGGCTGGCCGCTGGCGGGAAGG  
GGCCCGGGAACCTCAGAGCCCCCGCGGAGACAGCAGCCGCCTTGTTCCTCA  
GCCCGTGGCTT

**Figure S1.** Genomic sequences explored in this study. (A) Genomic sequence

surrounding *RANKL* isoform I TSS. qMSP primers for the downstream CpG island are emphasized in bold letters. CpG studied sites are underlined. Pyrosequencing primers are shown in italic bold letters. CpG sites studied are displayed shaded in gray.

(B) Genomic sequence in the vicinity of the OPG TSS. The sequence of qMSP primers is emphasized in bold letters. Pyrosequencing primers are shown in bold italic letters. CpG sites are displayed shaded in gray. Those CpG sites studied both, by pyrosequencing and qMSP, are displayed underlined and shaded in gray.
